# Supplementary material for: Estimating the mutational fitness effects distribution during early HIV infection
Source: Oxford University Press journal article supplement (doi:10.1093/ve/vey029), 2018-07-01
Supplement: vey029_supp_s1.pdf [file vey029_supp_s1.pdf]

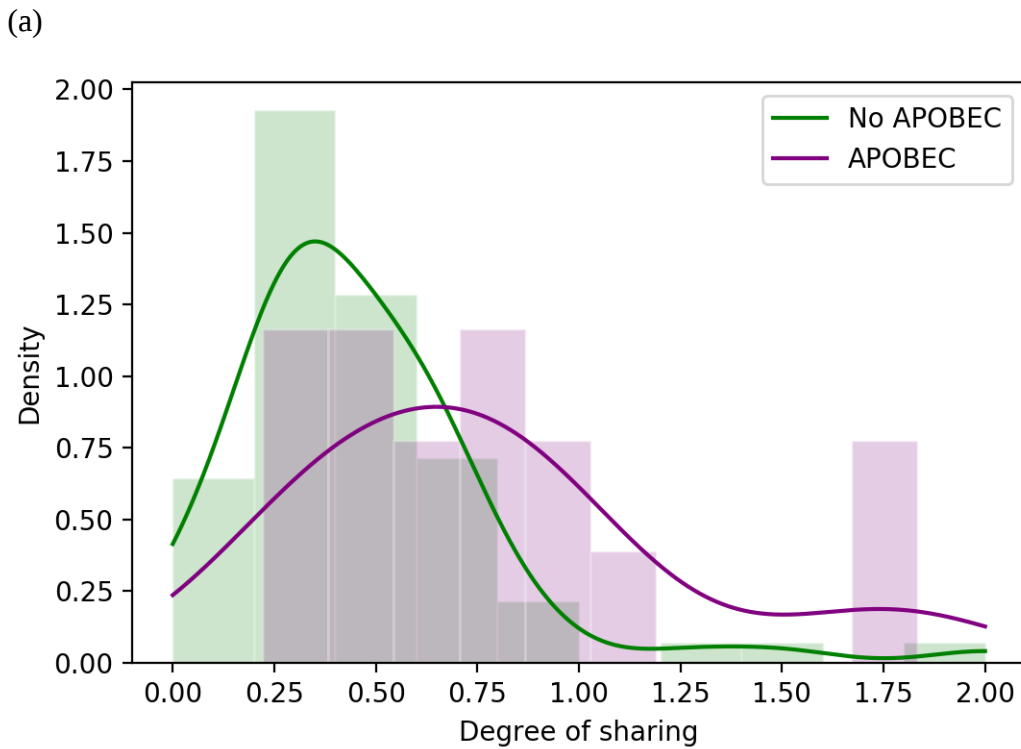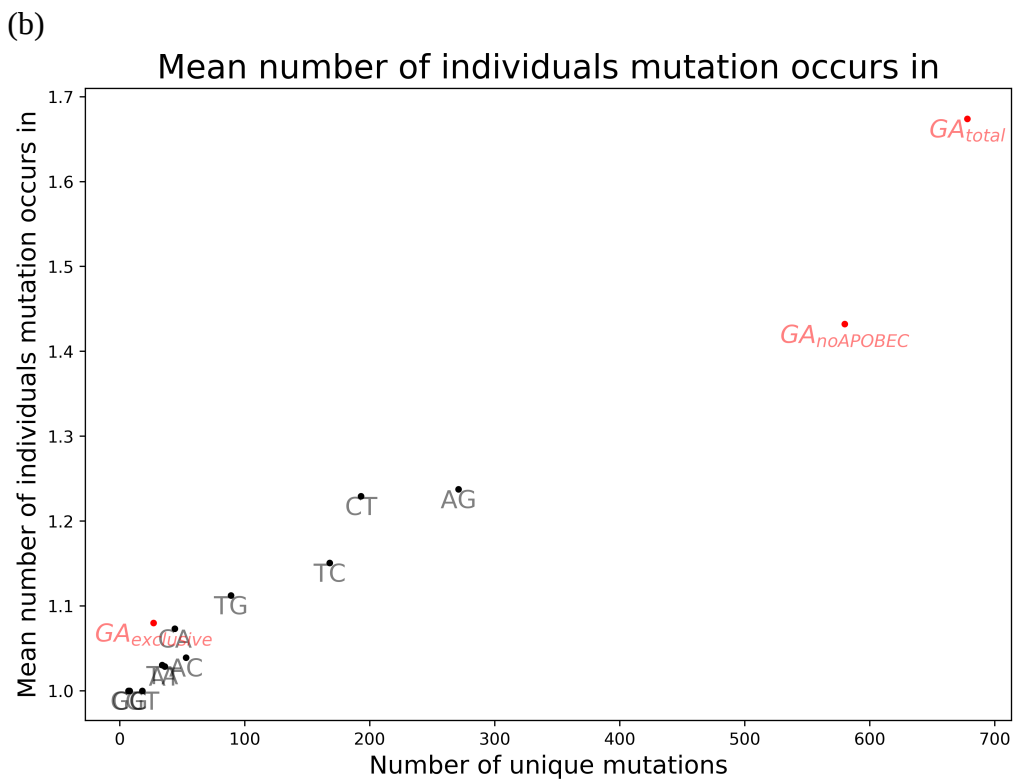

Figure S1: (a) distribution of the shared index for individuals with (purple) and without (green) APOBEC-mediated mutations. The individuals carrying APOBEC-mediated mutations have a significantly higher degree of sharing than those not having any mutations with APOBEC signature. (b) The mean number of individuals a mutation occurs in vs. the number of occurrences for each 'type' of mutation. The gray points represent all mutations that were not APOBEC-mediated. The red points indicate G-to-A mutations.  $GA_{noAPOBEC}$  excludes all apobec-mediated mutations,  $GA_{exclusive}$  are G-to-A mutations that are exclusively APOBEC-mediated,  $GA_{total}$  combines all G-to-A mutations. APOBEC introduces many mutations, but these mutations are not more shared than other mutations when correcting for their prevalence.
