# Supplementary material for: Estimating the mutational fitness effects distribution during early HIV infection
Source: Oxford University Press journal article supplement (doi:10.1093/ve/vey029), 2018-07-01
Supplement: vey029_supp_s2.pdf [file vey029_supp_s2.pdf]

| ID        | GENBANK accession | APOBEC | source       | number of sequences | number of unique mutations |
|-----------|-------------------|--------|--------------|---------------------|----------------------------|
| 63358     | EU575707-EU575733 | yes    | Keele et al. | 27                  | 24                         |
| 1001      | EU574937-EU574998 | yes    | Keele et al. | 62                  | 44                         |
| 4013440   | GU330809-GU330838 | no     | Li et al.    | 30                  | 14                         |
| 1006      | EU574999-EU575040 | no     | Keele et al. | 42                  | 12                         |
| 4013446   | GU330839-GU330861 | no     | Keele et al. | 23                  | 15                         |
| PRB931    | EU576568-EU576586 | no     | Keele et al. | 19                  | 20                         |
| SC51      | EU577006-EU577038 | no     | Keele et al. | 32                  | 13                         |
| TRJO4551  | EU577101-EU577118 | no     | Keele et al. | 16                  | 12                         |
| MEMI4948  | EU576522-EU576553 | no     | Keele et al. | 32                  | 44                         |
| 701010108 | GU331183-GU331217 | no     | Keele et al. | 35                  | 30                         |
| 700010077 | GU330916-GU331038 | no     | Keele et al. | 53                  | 31                         |
| Z05       | EU577447-EU577461 | no     | Keele et al. | 15                  | 10                         |
| Z36       | EU577762-EU577778 | no     | Keele et al. | 17                  | 17                         |
| Z02       | EU577404-EU577424 | no     | Keele et al. | 21                  | 13                         |
| Z34       | EU577723-EU577740 | no     | Keele et al. | 18                  | 10                         |
| TT34P     | EU577272-EU577300 | no     | Keele et al. | 29                  | 13                         |
| Z33       | EU577702-EU577722 | no     | Keele et al. | 21                  | 16                         |
| Z32       | EU577692-EU577701 | no     | Keele et al. | 10                  | 5                          |
| Z31       | EU577675-EU577691 | no     | Keele et al. | 17                  | 31                         |
| 4013242   | GU330462-GU330498 | no     | Keele et al. | 37                  | 29                         |
| 63215     | EU575688-EU575706 | yes    | Keele et al. | 18                  | 8                          |
| 62357     | EU575499-EU575512 | no     | Keele et al. | 14                  | 7                          |
| WEAU0575  | EU577344-EU579293 | no     | Keele et al. | 43                  | 33                         |
| SC45      | EU576977-EU577005 | no     | Keele et al. | 29                  | 13                         |
| Z13       | EU577479-EU577509 | no     | Keele et al. | 30                  | 40                         |
| REJO4541  | EU576706-EU576726 | no     | Keele et al. | 21                  | 13                         |
| Z27       | EU577604-EU577628 | no     | Keele et al. | 25                  | 22                         |
| Z20       | EU577563-EU577588 | no     | Keele et al. | 26                  | 14                         |
| Z23       | EU577589-EU577603 | no     | Keele et al. | 15                  | 6                          |
| TT35P     | EU577301-EU577343 | yes    | Keele et al. | 42                  | 21                         |
| 62995     | EU575621-EU575647 | no     | Keele et al. | 26                  | 10                         |
| 9028      | EU576027-EU576049 | no     | Keele et al. | 23                  | 5                          |
| 9029      | EU576050-EU576071 | yes    | Keele et al. | 21                  | 10                         |
| 9023      | EU575950-EU575967 | no     | Keele et al. | 18                  | 12                         |
| 9024      | EU575968-EU575992 | no     | Keele et al. | 23                  | 14                         |
| 9025      | EU575993-EU576011 | no     | Keele et al. | 19                  | 9                          |
| SC31      | EU576889-EU576924 | no     | Keele et al. | 36                  | 29                         |
| 9020      | EU575868-EU575892 | no     | Keele et al. | 25                  | 14                         |
| 9021      | EU575893-EU575926 | no     | Keele et al. | 34                  | 7                          |
| 9022      | EU575927-EU575949 | yes    | Keele et al. | 22                  | 8                          |
| PRB926    | EU576554-EU576567 | no     | Keele et al. | 14                  | 10                         |
| 62130     | EU575488-EU575498 | no     | Keele et al. | 11                  | 6                          |
| SC22      | EU576851-EU576888 | no     | Keele et al. | 38                  | 23                         |
| THRO4156  | EU577074-EU577100 | no     | Keele et al. | 27                  | 13                         |
| 1058      | EU575329-EU578828 | yes    | Keele et al. | 45                  | 35                         |
| SC20      | EU576808-EU576850 | no     | Keele et al. | 40                  | 14                         |
| 1059      | EU575374-EU578926 | yes    | Keele et al. | 39                  | 38                         |
| 1056      | EU575283-EU578774 | no     | Keele et al. | 46                  | 15                         |
| 9032      | EU576111-EU576149 | no     | Keele et al. | 39                  | 11                         |
| 9033      | EU576150-EU576169 | no     | Keele et al. | 20                  | 12                         |
| 9030      | EU576072-EU576090 | no     | Keele et al. | 18                  | 11                         |
| 9031      | EU576091-EU576110 | yes    | Keele et al. | 20                  | 15                         |
| 701010055 | GU331066-GU331093 | no     | Keele et al. | 28                  | 11                         |
| 9079      | EU576248-EU576273 | no     | Keele et al. | 26                  | 11                         |

|           |                   |     |              |    |    |
|-----------|-------------------|-----|--------------|----|----|
| INME0632  | GU331676-GU331721 | no  | Keele et al. | 46 | 23 |
| RHPA4259  | EU576727-EU576757 | yes | Keele et al. | 31 | 25 |
| 63396     | EU575734-EU575754 | no  | Keele et al. | 21 | 4  |
| SC11      | EU576788-EU576807 | no  | Keele et al. | 19 | 1  |
| 9075      | EU576170-EU576191 | no  | Keele et al. | 22 | 5  |
| 9077      | EU576224-EU576247 | no  | Keele et al. | 23 | 9  |
| 1054      | EU575244-EU575282 | no  | Keele et al. | 36 | 14 |
| 1053      | EU575184-EU575243 | yes | Keele et al. | 57 | 20 |
| 61792     | EU575469-EU575487 | no  | Keele et al. | 18 | 7  |
| 700010246 | GU330994-GU331038 | yes | Keele et al. | 45 | 28 |
| SC05      | EU576758-EU576787 | no  | Keele et al. | 29 | 13 |
| 700010106 | GU330916-GU330955 | yes | Keele et al. | 40 | 28 |
| TT31P     | EU577205-EU579134 | no  | Keele et al. | 67 | 31 |
| AD75      | GU331496-GU331549 | yes | Keele et al. | 54 | 27 |
| 9010      | EU575755-EU575773 | no  | Keele et al. | 19 | 10 |
| 6248      | EU575573-EU575592 | yes | Keele et al. | 20 | 24 |
| 9015      | EU575788-EU575823 | no  | Keele et al. | 36 | 11 |
| 9014      | EU575774-EU575787 | no  | Keele et al. | 13 | 4  |
| 9019      | EU575850-EU575867 | no  | Keele et al. | 17 | 9  |
| 9017      | EU575824-EU575849 | no  | Keele et al. | 26 | 6  |
| 700010040 | GU330916-GU331038 | no  | Keele et al. | 30 | 15 |
| 4013291   | GU330499-GU330523 | no  | Keele et al. | 25 | 19 |
| HOBRO961  | GU331634-GU331675 | no  | Keele et al. | 42 | 15 |
| TT29P     | EU577185-EU577204 | no  | Keele et al. | 20 | 5  |
| 4013296   | GU330524-GU330548 | no  | Keele et al. | 25 | 20 |
| 6240      | EU575513-EU575529 | no  | Keele et al. | 17 | 8  |
| WITO4160  | EU577388-EU577403 | no  | Keele et al. | 16 | 11 |
| 4013396   | GU330692-GU330730 | no  | Keele et al. | 39 | 17 |
| 6244      | EU575530-EU575540 | no  | Keele et al. | 11 | 4  |
| 6247      | EU575541-EU578951 | no  | Keele et al. | 31 | 7  |
| 701010027 | GU331039-GU331065 | no  | Keele et al. | 27 | 18 |
| 700010058 | GU330916-GU331038 | no  | Keele et al. | 47 | 38 |
| 4013327   | GU330598-GU330621 | no  | Keele et al. | 24 | 10 |
| 4013321   | GU330549-GU330597 | no  | Keele et al. | 49 | 36 |
| 4013226   | GU330363-GU330395 | no  | Keele et al. | 33 | 17 |
| TT28P     | EU577157-EU577184 | no  | Keele et al. | 28 | 9  |
| 1018      | EU575084-EU575133 | yes | Keele et al. | 50 | 40 |
| 1012      | EU575041-EU575083 | no  | Keele et al. | 42 | 23 |
| 63054     | EU575648-EU575667 | no  | Keele et al. | 20 | 9  |
| SUMA0874  | EU577039-EU579128 | yes | Keele et al. | 35 | 11 |
| 12007     | EU575413-EU575437 | yes | Keele et al. | 25 | 17 |
| PRB956    | EU576587-EU576613 | no  | Keele et al. | 27 | 12 |
| PRB958    | EU576650-EU576673 | no  | Keele et al. | 24 | 11 |
| PRB959    | EU576674-EU576705 | no  | Keele et al. | 32 | 12 |

Table S2: Accession numbers, extracted statistics and original source of the sequences used to estimate the MFED.
